# Supplementary material
Source: PubMed Central journal article supplement (PMC5794566)

**Figure S1:** Study population selection from the US Renal Data System. We identified a cohort of adult patients who received their first kidney transplant between 1990 and 2011 whose primary payer was Medicaid. \*Unmatched transplant dates are patients whose transplant dates were inconsistent between the patient and the transplant files of the dataset.

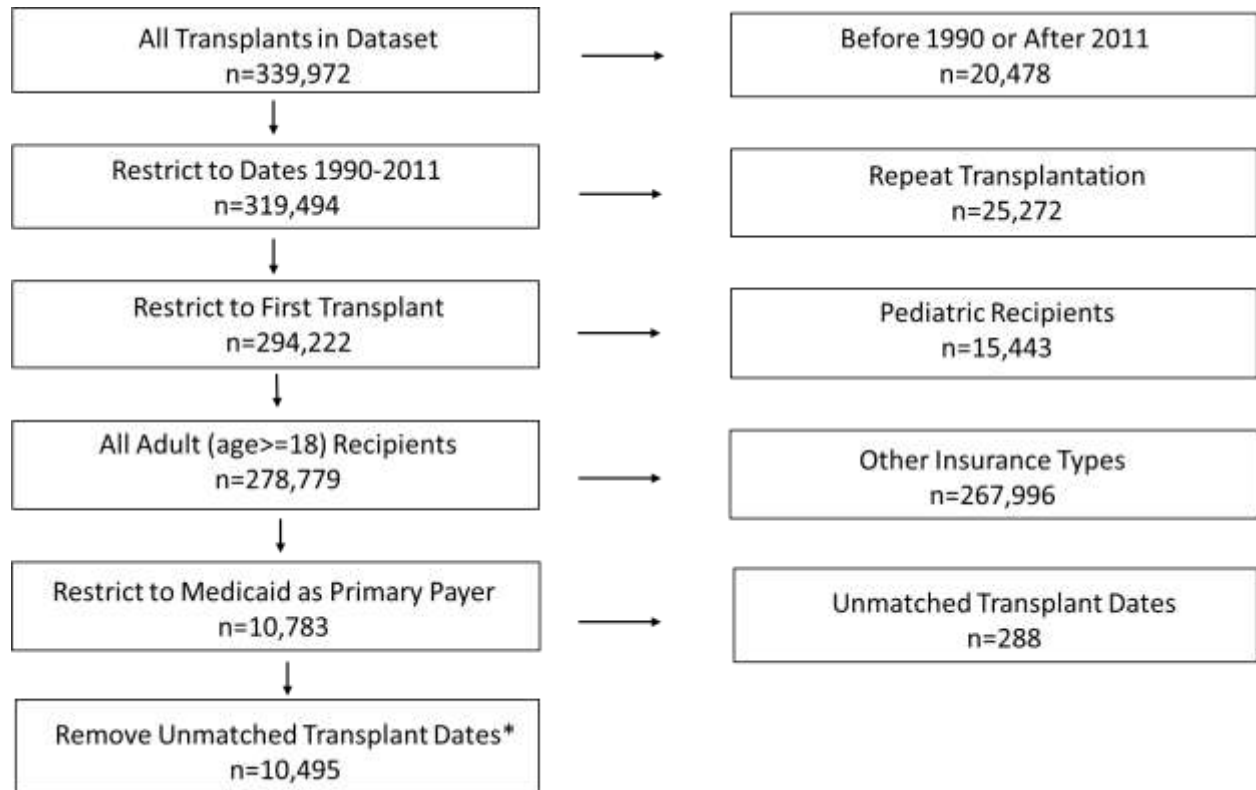

Supplement: NIHMS908534-supplement-1.pdf [file NIHMS908534-supplement-1.pdf]
