# Supplementary material
Source: PubMed Central journal article supplement (PMC5794566)

**Figure S2:** Unadjusted death-censored graft survival (estimated by cumulative incidence function) in adult patients on Medicaid who received kidney transplants from 1990-2011, by citizenship. Undocumented immigrant refers to nonresident alien.

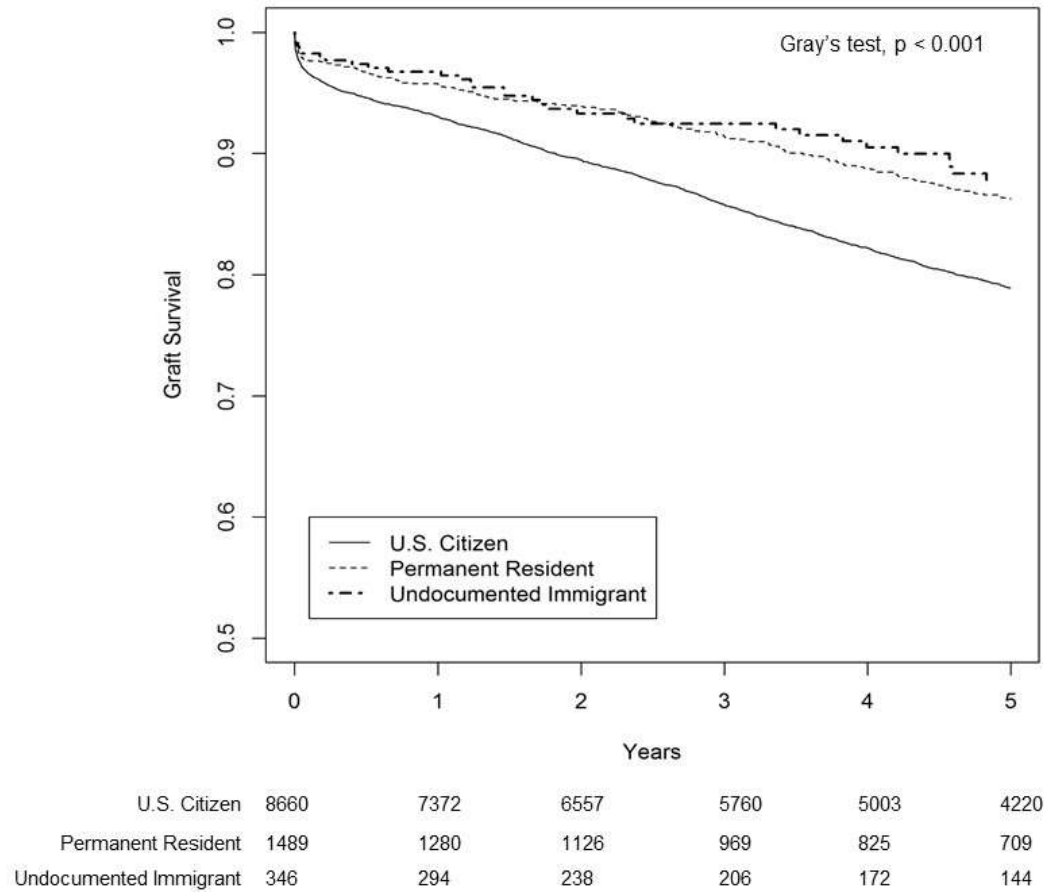

Supplement: NIHMS908534-supplement-2.pdf [file NIHMS908534-supplement-2.pdf]
