# Supplementary material
Source: PubMed Central journal article supplement (PMC5794566)

**Figure S3:** Kaplan-Meier Curve for unadjusted patient survival in adult patients on Medicaid who received kidney transplants from 1990-2011, by citizenship. Undocumented immigrant refers to nonresident alien.

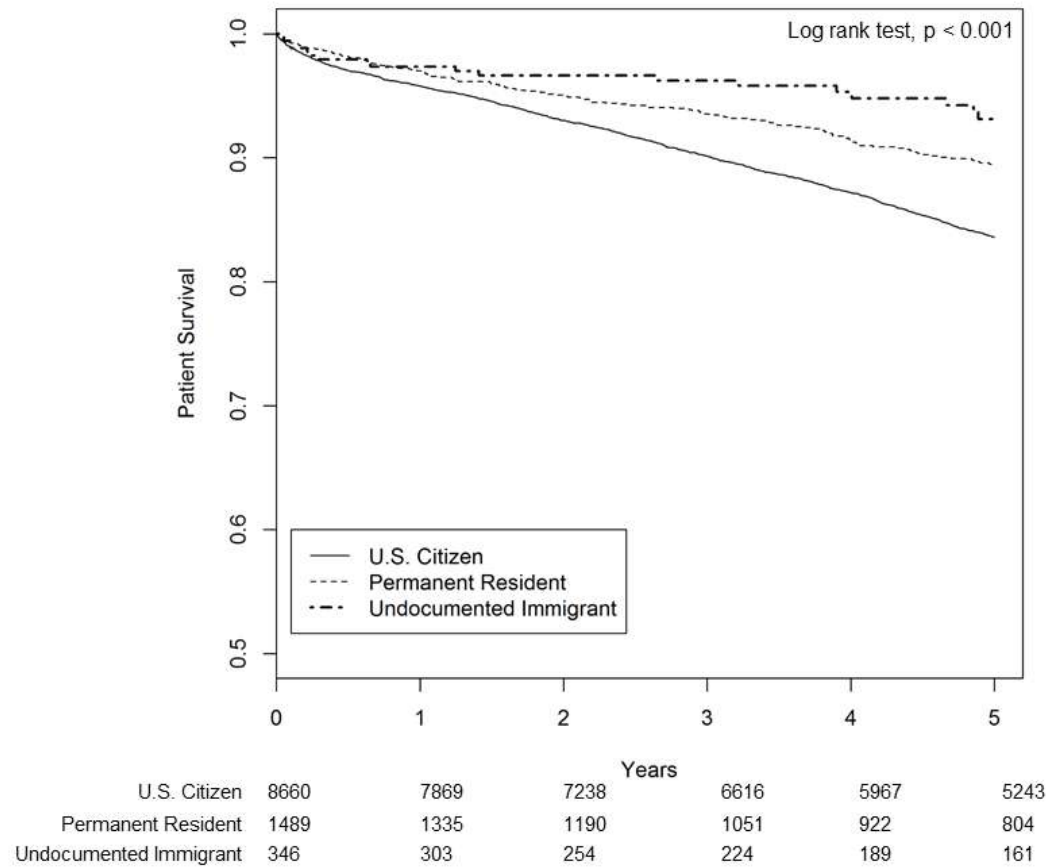

Supplement: NIHMS908534-supplement-3.pdf [file NIHMS908534-supplement-3.pdf]
