# Supplementary material
Source: PubMed Central journal article supplement (PMC5794566)
Supplement: NIHMS908534-supplement-4.pdf [file NIHMS908534-supplement-4.pdf]

**Item S1.** Hazard ratios for adverse transplant outcomes estimated from a frailty model clustered by transplant center.

**Table a.** Hazard ratios for adverse transplant outcomes for permanent residents and nonresident aliens combined vs. U.S. citizens estimated from a frailty model clustered by transplant center. Patients were followed for up to 5 years.

| Model                                       | Hazard Ratio (95% Confidence Interval) |                                        |                  |
|---------------------------------------------|----------------------------------------|----------------------------------------|------------------|
|                                             | All-cause graft loss                   | Death-censored graft loss <sup>a</sup> | Death            |
| 1) unadjusted                               | 0.61 (0.54-0.69)                       | 0.63 (0.54-0.73)                       | 0.61 (0.51-0.72) |
| 2) adjusted for demographics <sup>b</sup>   | 0.68 (0.60-0.77)                       | 0.73 (0.63-0.86)                       | 0.61 (0.51-0.73) |
| 3) model 2+ dialysis factors <sup>c</sup>   | 0.70 (0.61-0.79)                       | 0.75 (0.63-0.88)                       | 0.63 (0.52-0.76) |
| 4) model 3+ transplant factors <sup>d</sup> | 0.70 (0.61-0.80)                       | 0.76 (0.65-0.90)                       | 0.62 (0.51-0.75) |
| 5) model 4 + comorbidity count <sup>e</sup> | 0.70 (0.61-0.82)                       | 0.75 (0.63-0.90)                       | 0.62 (0.50-0.77) |

<sup>a</sup>: Hazard ratios for death-censored graft loss are cause-specific.

<sup>b</sup>: age, sex, race/ethnicity (Hispanic, non-Hispanic black, non-Hispanic white or other)

<sup>c</sup>: time on dialysis (<1 or ≥1 year) cause of kidney failure (diabetes, other, or unknown)

<sup>d</sup>: 0-HLA mismatch, living/deceased donor, transplant before 2000

<sup>e</sup>: Count included peripheral vascular disease, cerebrovascular disease, lung disease, cancer, and diabetes

**Table b.** Hazard ratios for adverse transplant outcomes with up to 3-year follow-up for nonresident aliens vs. U.S. citizens estimated from a frailty model clustered by transplant center.

| Model                                       | Hazard Ratio (95% Confidence Interval) <sup>a</sup> |                                        |                  |
|---------------------------------------------|-----------------------------------------------------|----------------------------------------|------------------|
|                                             | All-cause graft loss                                | Death-censored graft loss <sup>b</sup> | Death            |
| 1) unadjusted                               | 0.50 (0.35-0.71)                                    | 0.53 (0.35-0.81)                       | 0.41 (0.23-0.73) |
| 2) adjusted for demographics <sup>c</sup>   | 0.60 (0.42-0.86)                                    | 0.60 (0.39-0.92)                       | 0.55 (0.31-0.99) |
| 3) model 2+ dialysis factors <sup>d</sup>   | 0.62 (0.43-0.88)                                    | 0.61 (0.40-0.93)                       | 0.57 (0.32-1.01) |
| 4) model 3+ transplant factors <sup>e</sup> | 0.69 (0.44-1.00)                                    | 0.68 (0.44-1.05)                       | 0.66 (0.44-1.18) |
| 5) model 4 + comorbidity count <sup>f</sup> | 0.71 (0.48-1.06)                                    | 0.68 (0.42-1.09)                       | 0.73 (0.40-1.34) |

<sup>a</sup> Citizenship was a three-level variable. See table e of Item S1 for hazard ratios for permanent residents vs. US citizens. Type II p-values of the Wald test (i.e. null hypothesis of no difference across all three groups) was <0.01 for all outcomes.

<sup>b</sup> Hazard ratios for death-censored graft loss are cause-specific.

<sup>c</sup> age, sex, race/ethnicity (Hispanic, non-Hispanic black, non-Hispanic white or other)

<sup>d</sup> time on dialysis (<1 or ≥1 year) cause of kidney failure (diabetes, other, or unknown)

<sup>e</sup> 0-HLA mismatch, living/deceased donor, transplant before 2000

<sup>f</sup> Count included peripheral vascular disease, cerebrovascular disease, lung disease, cancer, and diabetes

**Table c.** Hazard ratios for adverse transplant outcomes with up to 1-year follow-up for nonresident aliens vs. U.S. citizens estimated from a frailty model clustered by transplant center.

| Model                                       | Hazard Ratio (95% Confidence Interval) <sup>a</sup> |                      |                                        |                      |                  |                      |
|---------------------------------------------|-----------------------------------------------------|----------------------|----------------------------------------|----------------------|------------------|----------------------|
|                                             | All-cause graft loss                                | p-value <sup>a</sup> | Death-censored graft loss <sup>b</sup> | p-value <sup>a</sup> | Death            | p-value <sup>a</sup> |
| 1) unadjusted                               | 0.55 (0.35-0.88)                                    | <0.001               | 0.46 (0.25-0.84)                       | <0.001               | 0.63 (0.32-1.24) | 0.06                 |
| 2) adjusted for demographics <sup>c</sup>   | 0.69 (0.43-1.10)                                    | 0.01                 | 0.54 (0.30-1.00)                       | 0.01                 | 0.83 (0.42-1.63) | 0.05                 |
| 3) model 2+ dialysis factors <sup>d</sup>   | 0.69 (0.43-1.10)                                    | 0.01                 | 0.53 (0.29-0.99)                       | 0.01                 | 0.85 (0.43-1.67) | 0.10                 |
| 4) model 3+ transplant factors <sup>e</sup> | 0.83 (0.52-1.32)                                    | 0.03                 | 0.64 (0.35-1.19)                       | 0.03                 | 1.00 (0.51-1.98) | 0.15                 |
| 5) model 4 + comorbidity count <sup>f</sup> | 0.82 (0.49-1.38)                                    | 0.01                 | 0.61 (0.31-1.21)                       | 0.03                 | 1.05 (0.51-2.17) | 0.27                 |

<sup>a</sup> Citizenship was a three-level variable. See table *f* of Item S1 for hazard ratios for permanent residents vs. US citizens. Type II p-values of the Wald test (i.e. null hypothesis of no difference across all three groups) are shown.

<sup>b</sup> Hazard ratios for death-censored graft loss are cause-specific.

<sup>c</sup> age, sex, race/ethnicity (Hispanic, non-Hispanic black, non-Hispanic white or other)

<sup>d</sup> time on dialysis (<1 or ≥1 year) cause of kidney failure (diabetes, other, or unknown)

<sup>e</sup> 0-HLA mismatch, living/deceased donor, transplant before 2000

<sup>f</sup> Count included peripheral vascular disease, cerebrovascular disease, lung disease, cancer, and diabetes

**Table d.** Hazard ratios for adverse transplant outcomes for permanent residents vs. U.S. citizens estimated from a frailty model clustered by transplant center. Patients were followed up to 5 years.

| Model                                       | Hazard Ratio (95% Confidence Interval) <sup>a</sup> |                                        |                  |
|---------------------------------------------|-----------------------------------------------------|----------------------------------------|------------------|
|                                             | All-cause graft loss                                | Death-censored graft loss <sup>b</sup> | Death            |
| 1) unadjusted                               | 0.64 (0.56-0.73)                                    | 0.65 (0.55-0.76)                       | 0.64 (0.53-0.78) |
| 2) adjusted for demographics <sup>c</sup>   | 0.70 (0.61-0.81)                                    | 0.77 (0.65-0.91)                       | 0.61 (0.51-0.75) |
| 3) model 2+ dialysis factors <sup>d</sup>   | 0.72 (0.63-0.83)                                    | 0.78 (0.66-0.93)                       | 0.63 (0.52-0.77) |
| 4) model 3+ transplant factors <sup>e</sup> | 0.71 (0.62-0.82)                                    | 0.79 (0.66-0.94)                       | 0.61 (0.50-0.75) |
| 5) model 4 + comorbidity count <sup>f</sup> | 0.71 (0.61-0.83)                                    | 0.77 (0.63-0.93)                       | 0.61 (0.49-0.77) |

<sup>a</sup> Citizenship was a three-level variable. See Table 3 for hazard ratios for non-resident aliens vs. US citizens. Type II p-values of the Wald test (i.e. null hypothesis of no difference across all three groups) was <0.001 for all outcomes.

<sup>b</sup> Hazard ratios for death-censored graft loss are cause-specific.

<sup>c</sup> age, sex, race/ethnicity (Hispanic, non-Hispanic black, non-Hispanic white or other)

<sup>d</sup> time on dialysis (<1 or ≥1 year) cause of kidney failure (diabetes, other, or unknown)

<sup>e</sup> 0-HLA mismatch, living/deceased donor, transplant before 2000

<sup>f</sup> Count included peripheral vascular disease, cerebrovascular disease, lung disease, cancer, and diabetes

**Table e.** Hazard ratios for adverse transplant outcomes with up to 3-year follow-up for permanent residents vs. U.S. citizens estimated from a frailty model clustered by transplant center.

| Model                                       | Hazard Ratio (95% Confidence Interval) <sup>a</sup> |                                        |                  |
|---------------------------------------------|-----------------------------------------------------|----------------------------------------|------------------|
|                                             | All-cause graft loss                                | Death-censored graft loss <sup>b</sup> | Death            |
| 1) unadjusted                               | 0.63 (0.54-0.74)                                    | 0.61 (0.50-0.75)                       | 0.66 (0.53-0.83) |
| 2) adjusted for demographics <sup>c</sup>   | 0.70 (0.59-0.82)                                    | 0.73 (0.60-0.90)                       | 0.62 (0.49-0.78) |
| 3) model 2+ dialysis factors <sup>d</sup>   | 0.72 (0.61-0.85)                                    | 0.75 (0.61-0.92)                       | 0.65 (0.51-0.83) |
| 4) model 3+ transplant factors <sup>e</sup> | 0.71 (0.61-0.85)                                    | 0.75 (0.61-0.85)                       | 0.64 (0.61-0.82) |
| 5) model 4 + comorbidity count <sup>f</sup> | 0.69 (0.57-0.84)                                    | 0.69 (0.54-0.87)                       | 0.65 (0.50-0.86) |

<sup>a</sup> Citizenship was a three-level variable. See Table b of Item S1 for hazard ratios for non-resident aliens vs. US citizens. Type II p-values of the Wald test (i.e. null hypothesis of no difference across all three groups) was <0.01 for all outcomes.

<sup>b</sup> Hazard ratios for death-censored graft loss are cause-specific.

age, sex, race/ethnicity (Hispanic, non-Hispanic black, non-Hispanic white or other)

<sup>c</sup> time on dialysis (<1 or ≥1 year) cause of kidney failure (diabetes, other, or unknown)

<sup>d</sup> 0-HLA mismatch, living/deceased donor, transplant before 2000

<sup>e</sup> Count included peripheral vascular disease, cerebrovascular disease, lung disease, cancer, and diabetes

**Table f.** Hazard ratios for adverse transplant outcomes with up to 1-year follow-up for permanent residents vs. U.S. citizens estimated from a frailty model clustered by transplant center.

| Model                                       | Hazard Ratio (95% Confidence Interval) <sup>a</sup> |                      |                                        |                      |                  |                      |
|---------------------------------------------|-----------------------------------------------------|----------------------|----------------------------------------|----------------------|------------------|----------------------|
|                                             | All-cause graft loss                                | p-value <sup>a</sup> | Death-censored graft loss <sup>b</sup> | p-value <sup>a</sup> | Death            | p-value <sup>a</sup> |
| 1) unadjusted                               | 0.68 (0.55-0.84)                                    | <0.001               | 0.62 (0.48-0.81)                       | <0.001               | 0.71 (0.52-0.99) | 0.06                 |
| 2) adjusted for demographics <sup>c</sup>   | 0.73 (0.59-0.91)                                    | 0.01                 | 0.71 (0.54-0.93)                       | 0.01                 | 0.66 (0.43-0.92) | 0.05                 |
| 3) model 2+ dialysis factors <sup>d</sup>   | 0.74 (0.59-0.93)                                    | 0.01                 | 0.71 (0.54-0.94)                       | 0.01                 | 0.69 (0.49-0.97) | 0.10                 |
| 4) model 3+ transplant factors <sup>e</sup> | 0.74 (0.59-0.94)                                    | 0.03                 | 0.71 (0.53-0.94)                       | 0.03                 | 0.71 (0.50-1.01) | 0.15                 |
| 5) model 4 + comorbidity count <sup>f</sup> | 0.71 (0.55-0.92)                                    | 0.01                 | 0.62 (0.44-0.86)                       | 0.03                 | 0.73 (0.50-1.08) | 0.27                 |

<sup>a</sup> Citizenship was a three-level variable. See Table c of Item S1 for hazard ratios for non-resident aliens vs. US citizens. Type II p-values of the Wald test (i.e. null hypothesis of no difference across all three groups) are shown.

<sup>b</sup> Hazard ratios for death-censored graft loss are cause-specific.

age, sex, race/ethnicity (Hispanic, non-Hispanic black, non-Hispanic white or other)

<sup>c</sup> time on dialysis (<1 or ≥1 year) cause of kidney failure (diabetes, other, or unknown)

<sup>d</sup> 0-HLA mismatch, living/deceased donor, transplant before 2000

<sup>e</sup> Count included peripheral vascular disease, cerebrovascular disease, lung disease, cancer, and diabetes
