# Supplementary material
Source: PubMed Central journal article supplement (PMC5794566)
Supplement: NIHMS908534-supplement-5.pdf [file NIHMS908534-supplement-5.pdf]

**Table S1.** Transplants of Medicaid recipients by state from 1990-2011.

| State          | Total number of transplants | % of transplant recipients that were non-resident aliens |
|----------------|-----------------------------|----------------------------------------------------------|
| Alabama        | 163                         | 0                                                        |
| Arizona        | 187                         | 0                                                        |
| Arkansas       | 26                          | 0                                                        |
| California     | 2197                        | 11                                                       |
| Colorado       | 71                          | 0                                                        |
| Connecticut    | 87                          | 0                                                        |
| Delaware       | *                           | 0                                                        |
| Florida        | 274                         | *                                                        |
| Georgia        | 62                          | *                                                        |
| Hawaii         | 29                          | *                                                        |
| Illinois       | 839                         | *                                                        |
| Indiana        | 109                         | 0                                                        |
| Iowa           | 46                          | 0                                                        |
| Kansas         | 38                          | 0                                                        |
| Kentucky       | 125                         | 0                                                        |
| Louisiana      | 219                         | 0                                                        |
| Maine          | 63                          | 0                                                        |
| Maryland       | 174                         | 0                                                        |
| Massachusetts  | 303                         | 6                                                        |
| Michigan       | 271                         | *                                                        |
| Minnesota      | 261                         | *                                                        |
| Mississippi    | 47                          | 0                                                        |
| Missouri       | 195                         | *                                                        |
| Nebraska       | 27                          | 0                                                        |
| Nevada         | 15                          | 0                                                        |
| New Hampshire  | 10                          | 0                                                        |
| New Jersey     | 194                         | *                                                        |
| New Mexico     | 57                          | 0                                                        |
| New York       | 1511                        | 2                                                        |
| North Carolina | 164                         | *                                                        |
| North Dakota   | 26                          | 0                                                        |
| Ohio           | 405                         | 0                                                        |
| Oklahoma       | 10                          | 0                                                        |
| Oregon         | 68                          | *                                                        |
| Pennsylvania   | 651                         | *                                                        |
| Rhode Island   | 24                          | 0                                                        |
| South Carolina | 88                          | 0                                                        |
| South Dakota   | 22                          | *                                                        |
| Tennessee      | 144                         | *                                                        |
| Texas          | 274                         | *                                                        |
| Utah           | 47                          | 0                                                        |
| Vermont        | 13                          | 0                                                        |
| Virginia       | 136                         | *                                                        |
| Washington     | 195                         | *                                                        |
| West Virginia  | 51                          | 0                                                        |
| Wisconsin      | 209                         | 0                                                        |

\* We have masked the specific percentages to prevent the N<10 cells from being calculated.
